# Supplementary material
Source: PubMed Central journal article supplement (PMC5729557)

**dBNST**

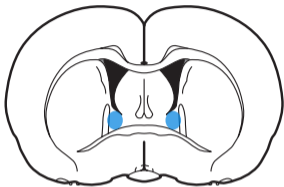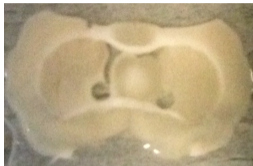

**CeA**

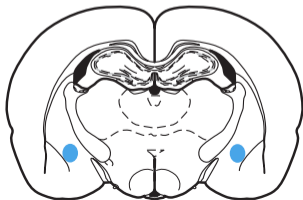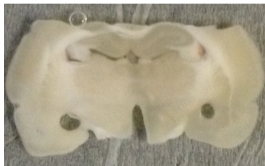

Supplement: npp2017134x2.pdf [file npp2017134x2.pdf]

**A**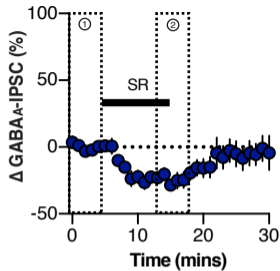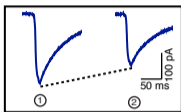**B**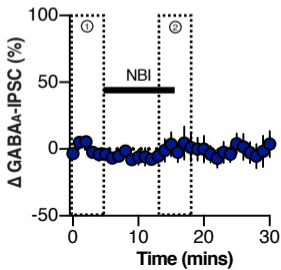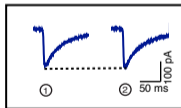

Supplement: npp2017134x3.pdf [file npp2017134x3.pdf]

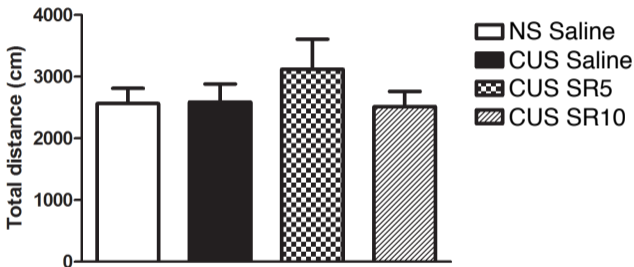

Supplement: npp2017134x4.pdf [file npp2017134x4.pdf]
